# Supplementary material
Source: publisher figshare collection journal article supplement (https://acs.figshare.com/ndownloader/files/14442827)
Supplement: Supplementary file 1 [file 14442827]

## Supporting Information

### **An Ultrasensitive Electrochemiluminescent Sensor for MicroRNA with Multinary Zn-Ag-In-S/ZnS Nanocrystals as Tags**

Bin Zhang,<sup>†</sup> Fang Zhang,<sup>†</sup> Ping Zhang,<sup>‡</sup> Dazhong Shen,<sup>‡</sup> Xuwen Gao,<sup>†</sup> Guizheng Zou<sup>†,\*</sup>

<sup>†</sup>*School of Chemistry and Chemical Engineering, Shandong University, Jinan 250100, China*

<sup>‡</sup>*College of Chemistry, Chemical Engineering and Materials Science, Key Laboratory of Molecular and Nano Probes, Ministry of Education, Shandong Normal University, Jinan 250014, PR China*

#### **Contents**

|            |                                                                  |            |
|------------|------------------------------------------------------------------|------------|
| <b>(a)</b> | <b>Chemicals and reagents .....</b>                              | <b>S-2</b> |
| <b>(b)</b> | <b>Apparatus and measurements.....</b>                           | <b>S-2</b> |
| <b>(c)</b> | <b>PL Life time parameters of ZAIS NCs and ZAIS/ZnS NCs.....</b> | <b>S-2</b> |
| <b>(d)</b> | <b>HRTEM of ZAIS/ZnS NCs.....</b>                                | <b>S-3</b> |
| <b>(e)</b> | <b>PL and ECL spectra characterization.....</b>                  | <b>S-3</b> |
| <b>(f)</b> | <b>LOD of different sensor for determining miRNA .....</b>       | <b>S-4</b> |

---

\* **Corresponding authors.** Tel.: +86 531 88364464; fax: +86 531 88564464. *E-mail address:* zouguizheng@sdu.edu.cn (G.-Z. Zou).

## (a) Chemicals and reagents

All chemical reagents were of analytical grade or better and used as received. P-aminobenzoic acid (ABA) was purchased from Kermel Chemical Reagent Co., Ltd. (Shanghai, China). Bovine serum albumin (BSA), tris(2-carboxyethyl) phosphine hydrochloride (TCEP), and indium acetate ( $\text{In}(\text{CH}_3\text{COO})_3$ ) were purchased from Sigma-Aldrich Chemicals Co. LLC. (St. Louis, MO, U.S.A.). Tris(hydroxymethyl)aminomethane (Tris), sodium chloride (NaCl), magnesium chloride ( $\text{MgCl}_2$ ), potassium phosphate monobasic ( $\text{KH}_2\text{PO}_4$ ), dipotassium hydrogen phosphate trihydrate ( $\text{K}_2\text{HPO}_4 \cdot 3\text{H}_2\text{O}$ ), potassium nitrate ( $\text{KNO}_3$ ), sodium hydroxide (NaOH), silver nitrate ( $\text{AgNO}_3$ ), 1-ethyl-3-(3-dimethyl-amino-propyl) carbodiimide hydrochloride (EDC), and *N*-hydroxysuccinimide (NHS) were obtained from Sinopharm Chemical Reagent Co., Ltd. (Shanghai, China). Potassium ferricyanide ( $\text{K}_3[\text{Fe}(\text{CN})_6]$ ), potassium hexacyanoferrate ( $\text{K}_4[\text{Fe}(\text{CN})_6]$ ), and ethylenediaminetetraacetic acid (EDTA) were purchased from Xilong Chemical Co., Ltd. (Shantou, China). Magnesium acetate ( $\text{Mg}(\text{CH}_3\text{COO})_2$ ), tri-*n*-propylamine (TPrA), and L-cysteine were purchased Aladdin Industrial Co., Ltd. (Shanghai, China). Acetic acid glacial ( $\text{CH}_3\text{COOH}$ ) was purchased from Yongda Chemical Reagent Co., Ltd. (Tianjin, China). Zinc acetate ( $\text{Zn}(\text{CH}_3\text{COO})_2 \cdot 2\text{H}_2\text{O}$ ) was purchased from Guangcheng Chemical Reagent Co., Ltd. (Tianjin, China). Thioacetamide (TAA) was obtained from Shanghai Macklin Biochemical Co., Ltd (Shanghai, China). Phosphate buffer (PB, pH 7.4, 10 mmol/L) was used as washing buffer.

## (b) Apparatus and measurements

Ultraviolet-visible (UV-vis) absorption spectra were recorded on a TU-1901 UV-vis spectrophotometer (Beijing Purkinje General Instrument Co., Ltd.). Photoluminescence (PL) spectra were recorded on an F-320 spectrofluorometer (Tianjin Gangdong Sci & Tech Development Co., Ltd.). The fluorescence lifetime decays and PL quantum yields were recorded on a fluorescence spectrometer (model FLS920, Edinburgh Instruments). High-resolution transmission electron microscopic (HRTEM) images were taken on a TecnaiG2 F30 transmission electron microscope with an acceleration voltage of 300 kV (Thermo Fisher Scientific Co.). Energy dispersive spectrometer (EDS) spectra were recorded by using a scanning electron microscope was performed with a SUPRA 55 field emission scanning electron microscope (Carl Zeiss AG, Germany). X-ray diffraction (XRD) pattern was recorded using an X-ray diffractometer (Bruker AXS D8 Advance, Germany) with Cu K $\alpha$  radiation ( $\lambda=1.5418\text{\AA}$ ). ECL and cyclic voltammetric (CV) measurements were carried out on an MPI-EII ECL analyzer (Xi'an Remex Analytical Instrument Co., Ltd., China) using a three-electrode system, including a 5 mm diameter glassy carbon work electrode (GCE), an Ag/AgCl (saturated KCl) reference electrode, and a Pt counter electrode. Differential pulse voltammetry (DPV) was recorded on a CHI 1040 electrochemical analyzer (Shanghai, China). ECL spectra acquisition were accomplished with a homemade ECL spectro-meter consisting of an Acton SP2300i monochromator equipped with a liquid N<sub>2</sub> cooled PyLoN 400BR-eXcelon digital CCD detector (Princeton Instruments, U.S.A) and a VersaSTAT 3 electrochemical analyzer (Princeton Applied Research, U.S.A.).<sup>1-3</sup> ECL emission at the electrode surface was collected with an objective lens before it was delivered to the ECL spectrum system.

## (c) PL Life time parameters of ZAIS NCs and ZAIS/ZnS NCs

**Table S1. PL Decay Constants Obtained from  $I(t) = y_0 + B_1 \exp(-t/\tau_1) + B_2 \exp(-t/\tau_2)$**

| samples  | Lifetime (ns) | $\tau_1$ (ns) | $B_1$ | $\tau_2$ (ns) | $B_2$ |
|----------|---------------|---------------|-------|---------------|-------|
| ZAIS     | 325           | 127.73        | 0.65  | 485.11        | 0.21  |
| ZAIS/ZnS | 438           | 205.54        | 0.55  | 719.12        | 0.13  |

The PL decay curves of ZAIS NCs and ZAIS/ZnS NCs could be well-fitted by a biexponential function  $I(t) = y_0 + B_1 \exp(-t/\tau_1) + B_2 \exp(-t/\tau_2)$ , where  $I(t)$  is the PL intensity at delay time ( $t$ ),  $B_1$  and  $B_2$  represent the relative weights of the decay components at  $t = 0$ ,  $t$  is time, and  $\tau_1$  and  $\tau_2$  are the lifetimes for the exponential components. The average lifetime constant ( $\tau^*$ ) could be calculated using the equation  $\tau^* = (B_1\tau_1^2 + B_2\tau_2^2)/(B_1\tau_1 + B_2\tau_2)$ , are listed in Table S1.

#### (d) HRTEM of ZAIS/ZnS NCs

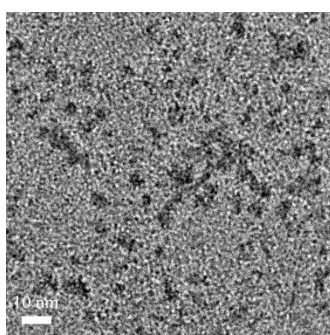

**Figure S1.** HRTEM pattern of ZAIS/ZnS NCs.

#### (e) PL and ECL spectra characterization

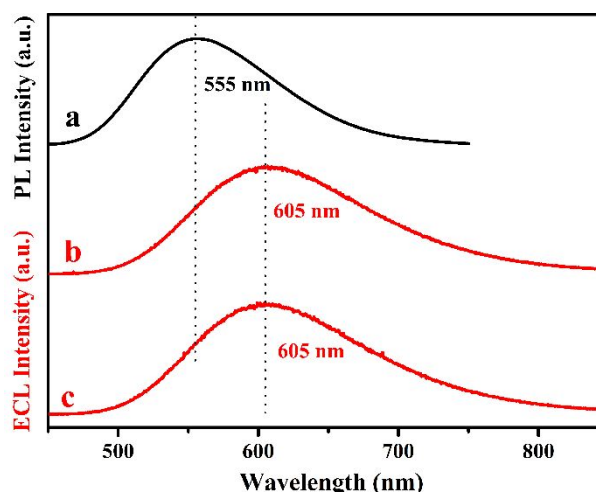

**Figure S2.** (a) PL spectrum of ZAIS/ZnS NCs; ECL spectra of (b) 0.50 mg/mL ZAIS/ZnS NCs and (c) GCE-ABA-tDNA<miRNA-141> pDNA-ZAIS/ZnS in PBS (0.1 mol/L, pH 7.4) containing 10 mmol/L TPrA. ECL spectra resulted from the total photons generated by scanning the potential from 0 to + 1.6 V for one cycle at 50 mV/s.

## (f) LOD of different sensor for determining miRNA

**Table S2. LOD of different MiRNA sensors**

| No. | Method           | Signal Tags                                                   | Target    | LOD     | Ref.          |
|-----|------------------|---------------------------------------------------------------|-----------|---------|---------------|
| 1   | electrochemistry | $[\text{Fe}(\text{CN})_6]^{3-}/[\text{Fe}(\text{CN})_6]^{4-}$ | miRNA-107 | 10 fM   | <sup>4</sup>  |
| 2   | fluorescence     |                                                               | miRNA-21  | 10 fM   | <sup>5</sup>  |
| 3   | fluorescence     |                                                               | let-7a    | 58 fM   | <sup>6</sup>  |
| 4   | ECL-RET          | $\text{CdSe@ZnS NCs-Ru}(\text{dcbpy})_3^{2+}$                 | miRNA-141 | 33 aM   | <sup>7</sup>  |
| 5   | ECL-RET          | $\text{C}_3\text{N}_4\text{-Ru}(\text{bpy})_3^{2+}$           | miRNA-21  | 0.5 fM  | <sup>8</sup>  |
| 6   | ECL              | CdS NCs                                                       | miRNA-21  | 0.16 fM | <sup>9</sup>  |
| 7   | ECL              | CdS:Mn NCs                                                    | miRNA-141 | 3.3 fM  | <sup>10</sup> |
| 8   | ECL              | ZAIS/ZnS NCs                                                  | CdS:Mn    | 50 aM   | herein        |

## Reference

- (1) He, Y.; Hou, S.; Yang, L.; Zhang, F.; Zou, G. Adjustable electrochemiluminescence from highly passivated CdTe/CdS nanocrystals by simple surface decoration with counterions. *Chem. Eur. J.* **2018**, *24* (38), 9592-9597.
- (2) Tan, X.; Zhang, B.; Zou, G. Electrochemistry and electrochemiluminescence of organometal halide perovskite nanocrystals in aqueous medium. *J. Am. Chem. Soc.* **2017**, *139* (25), 8772-8776.
- (3) Zhang, X.; Tan, X.; Zhang, B.; Miao, W.; Zou, G. Spectrum-based electrochemiluminescent immunoassay with ternary CdZnSe nanocrystals as labels. *Anal. Chem.* **2016**, *88* (13), 6947-6953.
- (4) Koo, K. M.; Carrascosa, L. G.; Shiddiky, M. J.; Trau, M. Poly(A) extensions of miRNAs for amplification-free electrochemical detection on screen-printed gold electrodes. *Anal. Chem.* **2016**, *88* (4), 2000-2005.
- (5) Duan, R.; Zuo, X.; Wang, S.; Quan, X.; Chen, D.; Chen, Z.; Jiang, L.; Fan, C.; Xia, F. Lab in a tube: ultrasensitive detection of microRNAs at the single-cell level and in breast cancer patients using quadratic isothermal amplification. *J. Am. Chem. Soc.* **2013**, *135* (12), 4604-4607.
- (6) Wang, L.; Deng, R.; Li, J. Target-fueled DNA walker for highly selective miRNA detection. *Chem. Sci.* **2015**, *6* (12), 6777-6782.
- (7) Li, Z.; Lin, Z.; Wu, X.; Chen, H.; Chai, Y.; Yuan, R. Highly efficient electrochemiluminescence resonance energy transfer system in one nanostructure: its application for ultrasensitive detection of microRNA in cancer cells. *Anal. Chem.* **2017**, *89* (11), 6029-6035.
- (8) Feng, Q. M.; Shen, Y. Z.; Li, M. X.; Zhang, Z. L.; Zhao, W.; Xu, J. J.; Chen, H. Y. Dual-wavelength electrochemiluminescence ratiometry based on resonance energy transfer between Au nanoparticles functionalized g-C<sub>3</sub>N<sub>4</sub> nanosheet and Ru(bpy)<sub>3</sub><sup>2+</sup> for microRNA detection. *Anal. Chem.* **2016**, *88* (1), 937-944.
- (9) Zhang, P.; Lin, Z.; Zhuo, Y.; Yuan, R.; Chai, Y. Dual microRNAs-fueled DNA nanogears: a case of regenerated strategy for multiple electrochemiluminescence detection of microRNAs with single luminophore. *Anal. Chem.* **2017**, *89* (2), 1338-1345.
- (10) Xu, Z.; Liao, L.; Chai, Y.; Wang, H.; Yuan, R. Ultrasensitive electrochemiluminescence

biosensor for microRNA detection by 3D DNA walking machine based target conversion and distance-controllable signal quenching and enhancing. *Anal. Chem.* **2017**, 89 (16), 8282-8287.
